# Supplementary material for: It More than Adds Up: Interaction of Antibiotic Mixing and Temperature
Source: MDPI journal article supplement (doi:10.3390/life11121435), 2021-12-20
Supplement: s1 [file s1]

## Supplementary Information

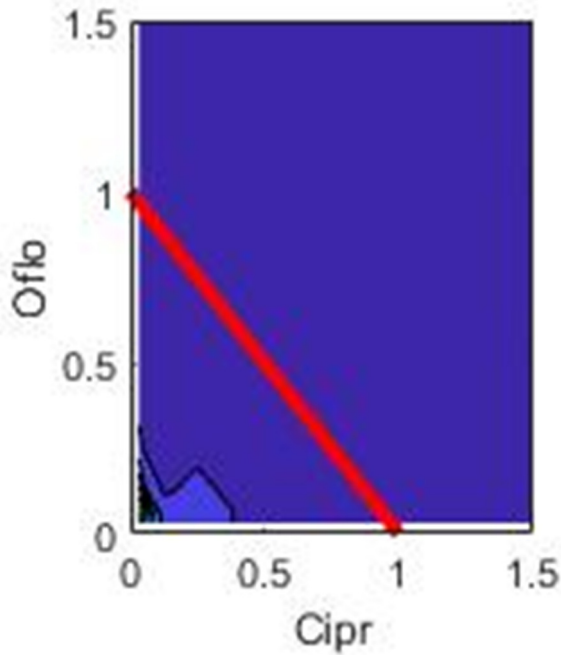

**Figure S1:** Checkerboard visualisation of a minimum-inhibitory concentration (MIC) experiment at 30°C showing the strong interaction of ciprofloxacin and ofloxacin. The heatmap indicates growth of *P. fluorescens* in treatments that had received a mixture of two antibiotics. A value of 1 indicates the MIC concentration of that particular antibiotic, set to 100%, hence a value of 0.5 indicates 50% of the MIC value. Yellow indicates visible growth of bacteria and cooler colours less growth; and purple indicates no growth. The area to the left-hand side of the 1:1 line (in red) represents mixing where growth is possible in theory if the antibiotics behave in an additive fashion. Combining ciprofloxacin and ofloxacin resulted in very reduced growth in all wells and growth is below what is expected from individual MIC values and proportions in mixture.

**Table S1:** EC<sub>50</sub> estimate for ciprofloxacin and ofloxacin, run at 25°C in *Pseudomonas fluorescens*, for 24 hours. We followed the dose-response method described by Ritz and colleagues (Ritz et al., 2015). These authors developed the extension package drc for the statistical environment R (R Development Core Team, 2017). In drc estimation of parameters is based on the maximum likelihood principle, which under the assumption of normally distributed response values simplifies to nonlinear least squares. The codes provided by the authors allow specifying the model assumptions about the dose-response relationship (dose-response models encompass a range of statistical models from nonlinear regression, generalized (non)linear regression, and parametric survival analysis). Further the approach by Ritz et al. (2015) has the advantage that it can output a number of extractors for summarizing fitted models and carrying out inference on derived parameters such as EC<sub>50</sub> (half maximal effective concentration) or ED50 (effective doses - this term is used by Ritz et al. [2015]). The denotation ED50 is used for continuous responses and this applies in our case but EC<sub>50</sub> is the common term used in the 'bacteria literature'. Because these models can only be constructed when concentrations are run that result in a plateau of inhibition, we added a dummy data point for all dose-response curves in the main experiment, extrapolating results from the one shown here - that had clearly shown that a plateau was fully reached at concentrations of 10 µg/mL.

|                             |                 |                   |                |                |     |
|-----------------------------|-----------------|-------------------|----------------|----------------|-----|
| <b>Ofloxacin</b>            |                 |                   |                |                |     |
| <b>Parameter estimates:</b> | <b>Estimate</b> | <b>Std. Error</b> | <b>t-value</b> | <b>p-value</b> |     |
| Slope:(Intercept)           | 1.817387        | 0.054604          | 33.283         | < 0.0001       | *** |
| Lower Limit:(Intercept)     | 6.158502        | 0.27998           | 21.996         | < 0.0001       | *** |
| ED50:(Intercept)            | 112.366533      | 1.296654          | 86.659         | < 0.0001       | *** |
|                             |                 |                   |                |                |     |
| <b>Ciprofloxacin</b>        |                 |                   |                |                |     |
| <b>Parameter estimates:</b> | <b>Estimate</b> | <b>Std. Error</b> | <b>t-value</b> | <b>p-value</b> |     |
| Slope:(Intercept)           | 2.002862        | 0.077143          | 25.963         | < 0.0001       | *** |
| Lower Limit:(Intercept)     | 6.002552        | 0.258551          | 23.216         | < 0.0001       | *** |
| ED50:(Intercept)            | 48.613358       | 0.40359           | 120.452        | < 0.0001       | *** |

**Table S2:** All models for dose-response curves for the experiment with four temperatures. These are dose-response models for the single antibiotics and the 50:50 mixture.

| Treatment                      | Model                      | logLik     | IC         | Lack of fit | Res var    |
|--------------------------------|----------------------------|------------|------------|-------------|------------|
| Ciprofloxacin:15               | Log-logistic (3 parameter) | -103.55301 | 213.106024 | 0.99693745  | 135.595672 |
| Ciprofloxacin:20               | Log-logistic (3 parameter) | -98.757085 | 203.514171 | 0.26928477  | 95.0519539 |
| Ciprofloxacin:25               | Log-logistic (3 parameter) | -82.209292 | 170.418583 | 0.41720594  | 27.9009611 |
| Ciprofloxacin + Ofloxacin:15   | Log-logistic (3 parameter) | -93.088149 | 192.176299 | 0.69479072  | 62.4585065 |
| Ciprofloxacin + Ofloxacin:17.5 | Log-logistic (3 parameter) | -88.952808 | 183.905616 | 0.1623297   | 45.9788206 |
| Ciprofloxacin + Ofloxacin:20   | Log-logistic (3 parameter) | -94.835672 | 195.671343 | 0.04074909  | 71.0901318 |
| Ciprofloxacin + Ofloxacin:25   | Log-logistic (3 parameter) | -80.880459 | 167.760919 | 0.26537109  | 25.2854495 |
| Ofloxacin:15                   | Log-logistic (3 parameter) | -101.0086  | 208.017207 | 0.27495962  | 112.303245 |
| Ofloxacin:17.5                 | Log-logistic (3 parameter) | -110.59723 | 227.194468 | 0.30594334  | 228.485255 |
| Ofloxacin:20                   | Log-logistic (3 parameter) | -96.636677 | 199.273354 | 0.95585323  | 81.2358253 |
| Ofloxacin:25                   | Log-logistic (3 parameter) | -78.033656 | 162.067312 | 0.11720093  | 20.4780749 |
| Ciprofloxacin:17.5             | Log-logistic (3 parameter) | -115.62394 | 237.247878 | 0.53372713  | 331.563788 |
| Ciprofloxacin:15               | Log-logistic (4 parameter) | -103.45943 | 212.91887  | 0.99829418  | 134.659021 |
| Ciprofloxacin:17.5             | Log-logistic (4 parameter) | -115.85912 | 237.71824  | 0.49333324  | 337.390493 |
| Ciprofloxacin:20               | Log-logistic (4 parameter) | -98.982678 | 203.965356 | 0.24470915  | 96.6536718 |
| Ciprofloxacin:25               | Log-logistic (4 parameter) | -78.22245  | 162.444901 | 0.99283589  | 20.7664679 |
| Ciprofloxacin + Ofloxacin:15   | Log-logistic (4 parameter) | -92.759535 | 191.51907  | 0.75415588  | 60.9565087 |
| Ciprofloxacin + Ofloxacin:17.5 | Log-logistic (4 parameter) | -89.042876 | 184.085752 | 0.15571737  | 46.2866032 |
| Ciprofloxacin + Ofloxacin:20   | Log-logistic (4 parameter) | -95.675481 | 197.350961 | 0.02603795  | 75.6529633 |
| Ciprofloxacin + Ofloxacin:25   | Log-logistic (4 parameter) | -79.012603 | 164.025207 | 0.53700043  | 22.0182007 |
| Ofloxacin:15                   | Log-logistic (4 parameter) | -101.15323 | 208.306451 | 0.25873125  | 113.512787 |
| Ofloxacin:17.5                 | Log-logistic (4 parameter) | -111.06019 | 228.120385 | 0.25228752  | 236.456648 |
| Ofloxacin:20                   | Log-logistic (4 parameter) | -96.13508  | 198.27016  | 0.9880826   | 78.2728667 |
| Ofloxacin:25                   | Log-logistic (4 parameter) | -74.755449 | 155.510899 | 0.46983     | 16.0630992 |
| Ciprofloxacin:20               | Weibull I (3 parameter)    | -96.839451 | 199.678903 | 0.55189244  | 82.4652234 |
| Ciprofloxacin:25               | Weibull I (3 parameter)    | -88.268137 | 182.536274 | 0.02364205  | 43.7050871 |
| Ciprofloxacin + Ofloxacin:15   | Weibull I (3 parameter)    | -93.760399 | 193.520798 | 0.57218144  | 65.6474471 |
| Ciprofloxacin + Ofloxacin:17.5 | Weibull I (3 parameter)    | -87.656443 | 181.312886 | 0.28647265  | 41.768974  |
| Ciprofloxacin + Ofloxacin:20   | Weibull I (3 parameter)    | -91.660777 | 189.321554 | 0.19374693  | 56.1918175 |
| Ciprofloxacin:15               | Weibull I (3 parameter)    | -103.76516 | 213.53032  | 0.99166479  | 137.743346 |
| Ciprofloxacin + Ofloxacin:25   | Weibull I (3 parameter)    | -84.006624 | 174.013247 | 0.06083321  | 31.8741979 |
| Ofloxacin:15                   | Weibull I (3 parameter)    | -100.87827 | 207.756534 | 0.2902434   | 111.224222 |
| Ofloxacin:17.5                 | Weibull I (3 parameter)    | -109.56547 | 225.130944 | 0.45392859  | 211.673469 |
| Ofloxacin:20                   | Weibull I (3 parameter)    | -96.737079 | 199.474158 | 0.94656129  | 81.8422423 |
| Ofloxacin:25                   | Weibull I (3 parameter)    | -78.491599 | 162.983197 | 0.09380644  | 21.1846415 |
| Ciprofloxacin:17.5             | Weibull I (3 parameter)    | -115.18689 | 236.373785 | 0.61190359  | 321.001691 |
| Ciprofloxacin:15               | Weibull I (4 parameter)    | -103.34187 | 212.68373  | 0.99933842  | 133.491385 |
| Ciprofloxacin:20               | Weibull I (4 parameter)    | -96.544653 | 199.089306 | 0.60482026  | 80.6839579 |
| Ciprofloxacin:25               | Weibull I (4 parameter)    | -81.986628 | 169.973256 | 0.45227172  | 27.4445479 |
| Ciprofloxacin + Ofloxacin:15   | Weibull I (4 parameter)    | -92.820228 | 191.640456 | 0.74333584  | 61.2311738 |
| Ciprofloxacin + Ofloxacin:17.5 | Weibull I (4 parameter)    | -86.455871 | 178.911741 | 0.45530761  | 38.2147869 |
| Ciprofloxacin + Ofloxacin:20   | Weibull I (4 parameter)    | -91.391997 | 188.783994 | 0.21825177  | 55.0841232 |
| Ciprofloxacin + Ofloxacin:25   | Weibull I (4 parameter)    | -77.391941 | 160.783883 | 0.82610216  | 19.5274346 |
| Ofloxacin:15                   | Weibull I (4 parameter)    | -100.92422 | 207.84843  | 0.28478361  | 111.603428 |
| Ofloxacin:17.5                 | Weibull I (4 parameter)    | -109.81349 | 225.626984 | 0.41489088  | 215.598247 |
| Ofloxacin:20                   | Weibull I (4 parameter)    | -96.014096 | 198.028192 | 0.99243929  | 77.5745355 |
| Ofloxacin:25                   | Weibull I (4 parameter)    | -75.345674 | 156.691349 | 0.3784651   | 18.709622  |
| Ciprofloxacin:17.5             | Weibull I (4 parameter)    | -115.10806 | 236.216118 | 0.62629159  | 319.132658 |
| Ciprofloxacin:17.5             | Weibull 2 (3 parameter)    | -116.69593 | 239.391856 | 0.36342213  | 358.965688 |
| Ciprofloxacin:20               | Weibull 2 (3 parameter)    | -101.19045 | 208.380905 | 0.0877469   | 113.826238 |
| Ciprofloxacin:25               | Weibull 2 (3 parameter)    | -80.768313 | 167.536626 | 0.66632932  | 25.0762696 |
| Ciprofloxacin + Ofloxacin:15   | Weibull 2 (3 parameter)    | -93.126665 | 192.25333  | 0.68774284  | 62.6369557 |
| Ciprofloxacin + Ofloxacin:17.5 | Weibull 2 (3 parameter)    | -92.01645  | 190.032901 | 0.03517391  | 57.6919324 |
| Ciprofloxacin + Ofloxacin:20   | Weibull 2 (3 parameter)    | -98.649614 | 203.299228 | 0.00492552  | 94.2982654 |
| Ciprofloxacin + Ofloxacin:25   | Weibull 2 (3 parameter)    | -83.840104 | 173.680209 | 0.0662205   | 31.4834522 |
| Ciprofloxacin:15               | Weibull 2 (3 parameter)    | -103.78072 | 213.561444 | 0.99114179  | 137.902217 |
| Ofloxacin:15                   | Weibull 2 (3 parameter)    | -109.53644 | 225.072878 | 0.00322304  | 211.218738 |
| Ofloxacin:17.5                 | Weibull 2 (3 parameter)    | -112.6745  | 231.349004 | 0.12129438  | 266.491776 |
| Ofloxacin:20                   | Weibull 2 (3 parameter)    | -113.86549 | 233.730975 | 0.00024603  | 291.070215 |
| Ofloxacin:25                   | Weibull 2 (3 parameter)    | -117.41516 | 240.830326 | 2.52E-12    | 378.608788 |
| Ciprofloxacin:17.5             | Weibull 2 (4 parameter)    | -117.07972 | 240.159438 | 0.31218639  | 369.317143 |
| Ciprofloxacin:20               | Weibull 2 (4 parameter)    | -101.52037 | 209.040748 | 0.07442636  | 116.642266 |
| Ciprofloxacin:25               | Weibull 2 (4 parameter)    | -79.360041 | 164.720082 | 0.90051271  | 22.5922188 |
| Ciprofloxacin + Ofloxacin:15   | Weibull 2 (4 parameter)    | -93.585694 | 193.171388 | 0.60370588  | 64.8033703 |
| Ciprofloxacin + Ofloxacin:17.5 | Weibull 2 (4 parameter)    | -92.606914 | 191.213829 | 0.02563322  | 60.2712625 |
| Ciprofloxacin + Ofloxacin:20   | Weibull 2 (4 parameter)    | -99.267827 | 204.535654 | 0.00344192  | 98.7169169 |
| Ciprofloxacin + Ofloxacin:25   | Weibull 2 (4 parameter)    | -84.918345 | 175.83669  | 0.03785853  | 34.1011717 |
| Ofloxacin:15                   | Weibull 2 (4 parameter)    | -109.25747 | 224.514932 | 0.00379158  | 206.898765 |
| Ciprofloxacin:15               | Weibull 2 (4 parameter)    | -104.19913 | 214.398264 | 0.96902466  | 142.24319  |
| Ofloxacin:17.5                 | Weibull 2 (4 parameter)    | -113.18799 | 232.375976 | 0.09455124  | 276.823295 |
| Ofloxacin:20                   | Weibull 2 (4 parameter)    | -113.66362 | 233.327243 | 0.00027839  | 286.750215 |
| Ofloxacin:25                   | Weibull 2 (4 parameter)    | -117.26024 | 240.520479 | 2.79E-12    | 374.288788 |
